# Supplementary material for: An In Vivo Platform for Rebuilding Functional Neocortical Tissue
Source: MDPI journal article supplement (doi:10.3390/bioengineering10020263), 2023-02-16
Supplement: s1 [file s1]

Article

# An in vivo platform for rebuilding functional neocortical tissue

Alexandra Quezada<sup>1,2,‡</sup>, Claire Ward<sup>1,‡</sup>, Edward R. Bader<sup>3</sup>, Pavlo Zolotavin<sup>4</sup>, Esra Altun<sup>4</sup>, Sarah Hong<sup>1</sup>, Nathan Killian<sup>3</sup>, Chong Xie<sup>4</sup>, Renata Batista-Brito<sup>1§</sup>, Jean M. Hébert<sup>1,2,5,§</sup>

<sup>1</sup> Department of Neuroscience, Albert Einstein College of Medicine, Bronx, NY, USA

<sup>2</sup> Stem Cell Institute, Albert Einstein College of Medicine, Bronx, NY, USA

<sup>3</sup> Department of Neurological Surgery, Albert Einstein College of Medicine, Bronx, NY, USA

<sup>4</sup> Department of Electrical and Computer Engineering, Rice University, Houston, TX, USA

<sup>5</sup> Department of Genetics, Albert Einstein College of Medicine, Bronx, NY, USA

\* Correspondence: jean.hebert@einsteinmed.edu

‡ Co-first authors

§ Co-senior authors

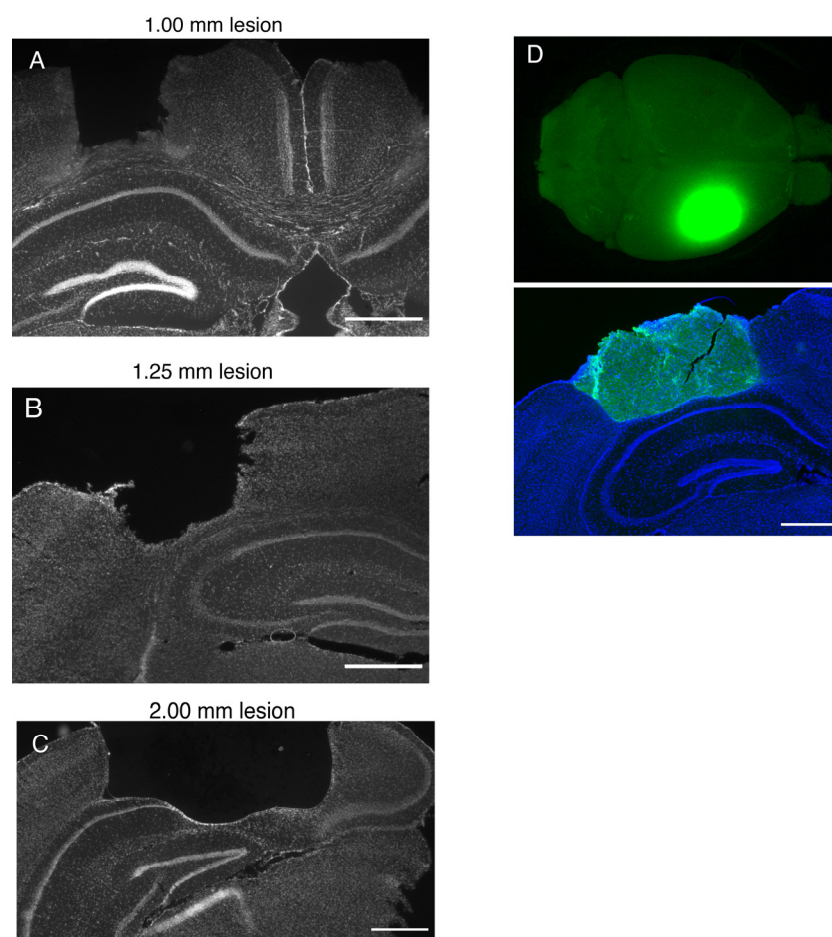

**Figure S1.** Cortical lesions can differ in size without obvious impacts on engraftment. A. 1 mm cortical lesion (Scale bar=1 mm). B. 1.25 mm cortical lesion (Scale bar=1 mm). C. 2 mm cortical lesion (Scale bar=1 mm). D. Representative image of a 2 mm graft. Top panel, GFP-labeled graft in whole mouse brain. Bottom panel, immunofluorescence image of coronal section of graft (Scale bar, 1 mm).

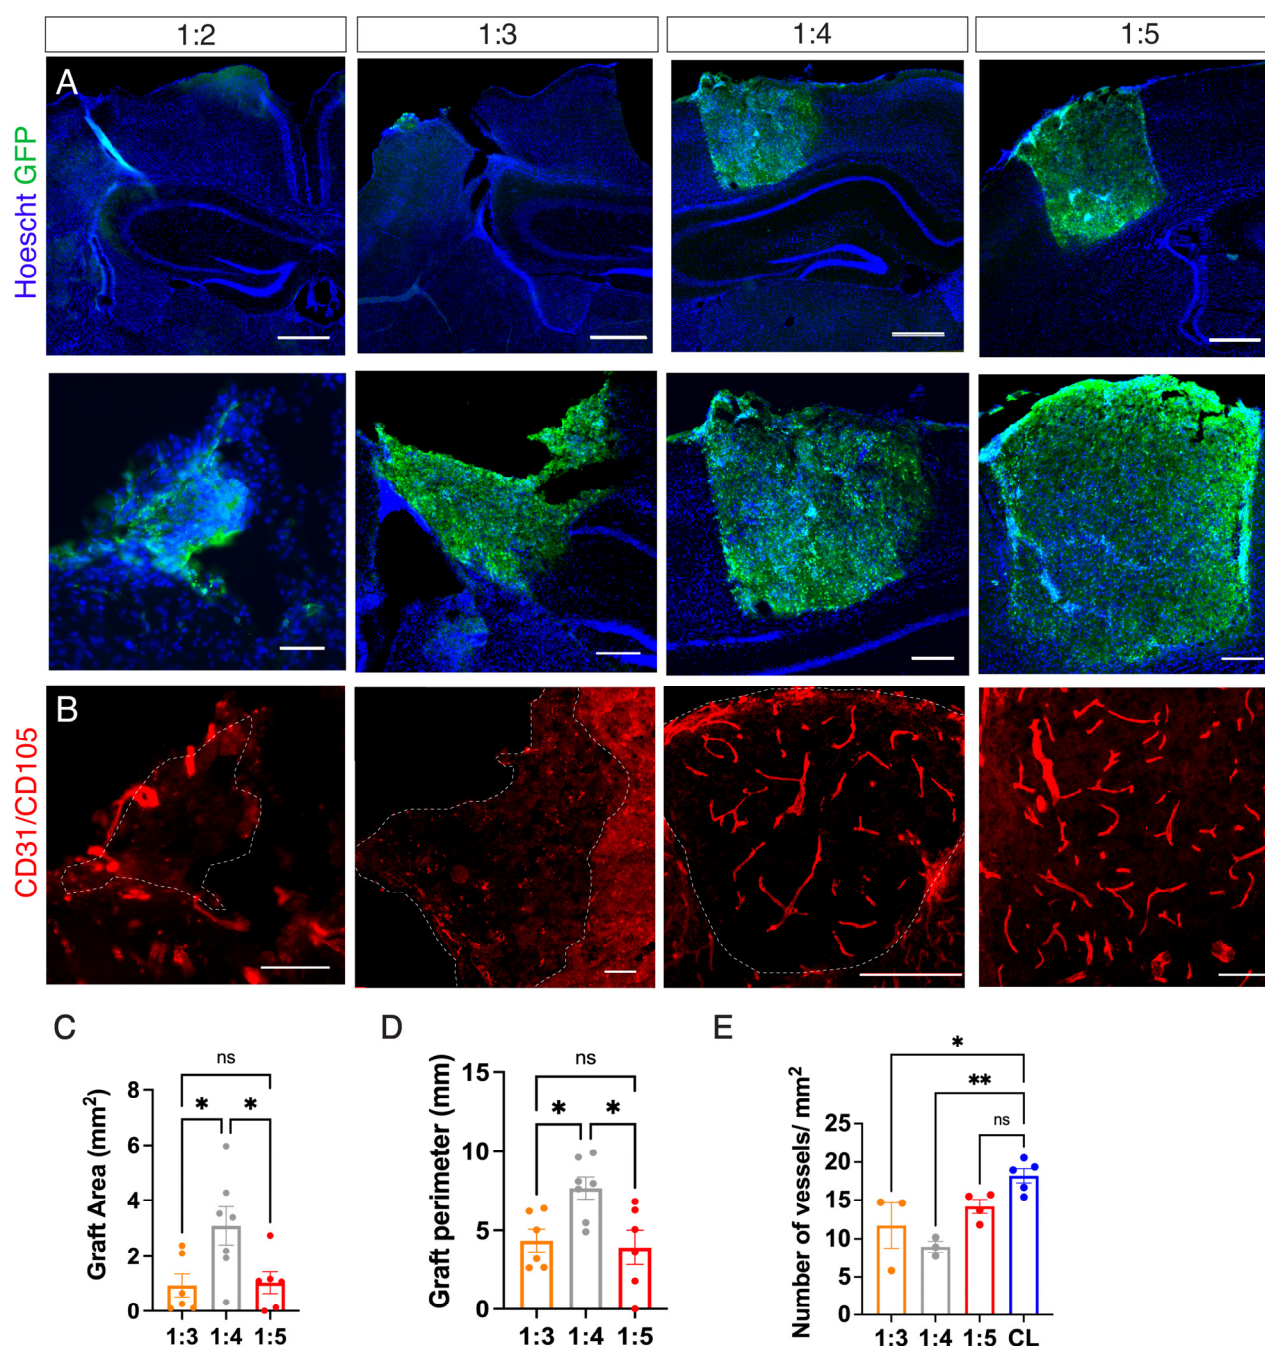

**Figure S2. The quality of grafts depends on scaffold concentration.** A. Representative immunofluorescence images of grafts with volume ratios of Matrigel:media from left to right of 1:2, 1:3, 1:4, 1:5. Top row, low magnification (Scale bars from left to right = 800  $\mu$ m, 500  $\mu$ m, 1 mm, 1 mm). Bottom row, higher magnification (Scale bars from left to right = 100  $\mu$ m, 150  $\mu$ m, 300  $\mu$ m, 300  $\mu$ m). B. Representative immunofluorescence images of graft vasculature for each Matrigel:media ratio (Scale bars from left to right = 100  $\mu$ m, 150  $\mu$ m, 500  $\mu$ m, 200  $\mu$ m). C. Quantification of graft area. Grafts with 1:4 dilution (N = 7, mean = 3.01 mm<sup>2</sup>), were significantly larger than 1:3, (N = 6, mean = 0.93 mm<sup>2</sup>, p = 0.03) and 1:5, (N = 6, mean = 1.03 mm<sup>2</sup>, p = 0.04). D. Quantification of graft perimeter. Grafts with the 1:4 dilution (N = 7, mean = 7.66 mm), shared a significantly longer border with the host tissue than the 1:3 (N = 6, mean = 4.36 mm, p = 0.03) and 1:5mm<sup>2</sup> (N = 6, mean=3.92 mm, p = 0.002). E. Quantification of vessel density in grafts. Contralateral cortex had significantly higher vessel density than grafts with the 1:3 dilution (N=3, mean= 11.72 mm<sup>2</sup>, p=0.02) and 1:4 dilution (N = 3, mean = 8.97 mm<sup>2</sup>, p = 0.002). Grafts with the 1:5 dilution (N = 4, mean = 14.18 mm<sup>2</sup>, p = 0.13) were not statistically different than contralateral cortex.
